# Supplementary material
Source: PubMed Central journal article supplement (PMC2781558)

## Supplemental Figure Legend

PKC $\theta$  protein and mRNA expressed in Huh-7 compared to Jurkat cells. **A.** Immunoblot for total PKC $\theta$  protein using whole cell extract from Jurkat or Huh-7 cells demonstrated a faster migrating polypeptide expressed in Huh-7 cells. **B.** Schematic diagram of the coding sequence (CDS) of PKC $\theta$  mRNA, indicating exons 2-18. The regulatory domain contains Thr<sup>538</sup> and phosphorylation at this residue induces an activating conformational change. Antisera to total and phospho- Thr<sup>538</sup> PKC $\theta$  detects this faster migrating polypeptide in Huh-7 cells (see Figures 6 and 7, in addition to Supplemental Figure 1A). Amplicons generated by long-distance PCR using primers in exons 2-15 or 2-18 are indicated with a dashed line. **C.** Long distance RT-PCR performed on total RNA from Huh-7 cells or Jurkat cells was electrophoretically separated on a 1% agarose gel and visualized by staining with ethidium bromide. The captured image was inverted to show dark bands on a lighter background for clarity.

## Supplemental Figure

**A**

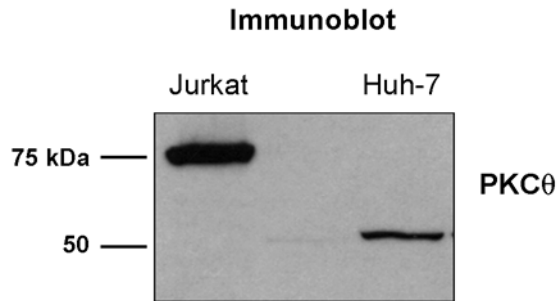

**B**

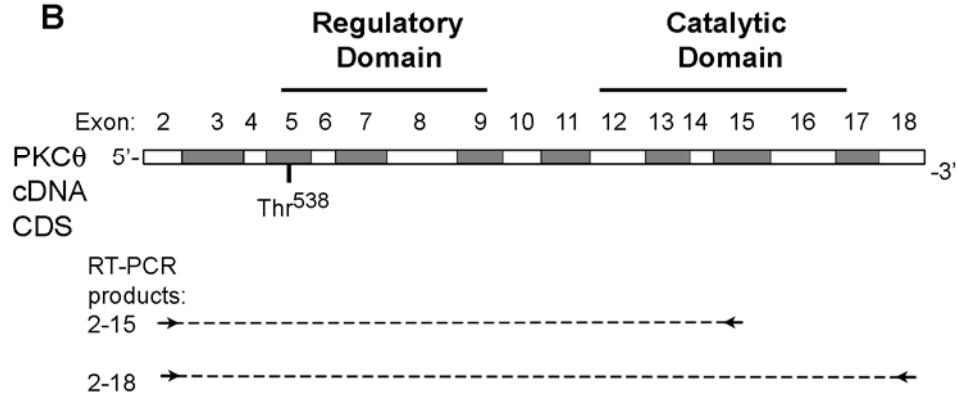

**C**

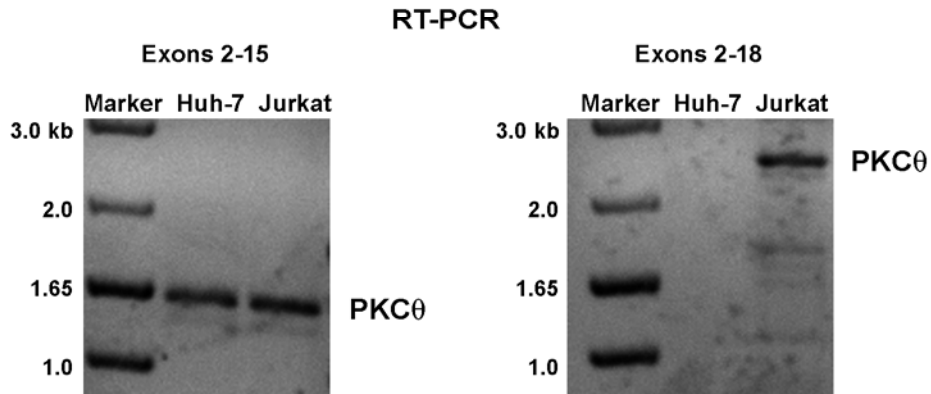

Supplement: supp_M109.039545_jbc.M109.039545-1.pdf [file supp_M109.039545_jbc.M109.039545-1.pdf]
